# Supplementary material
Source: PubMed Central journal article supplement (PMC4763614)

# Supplementary Figure 1

## A

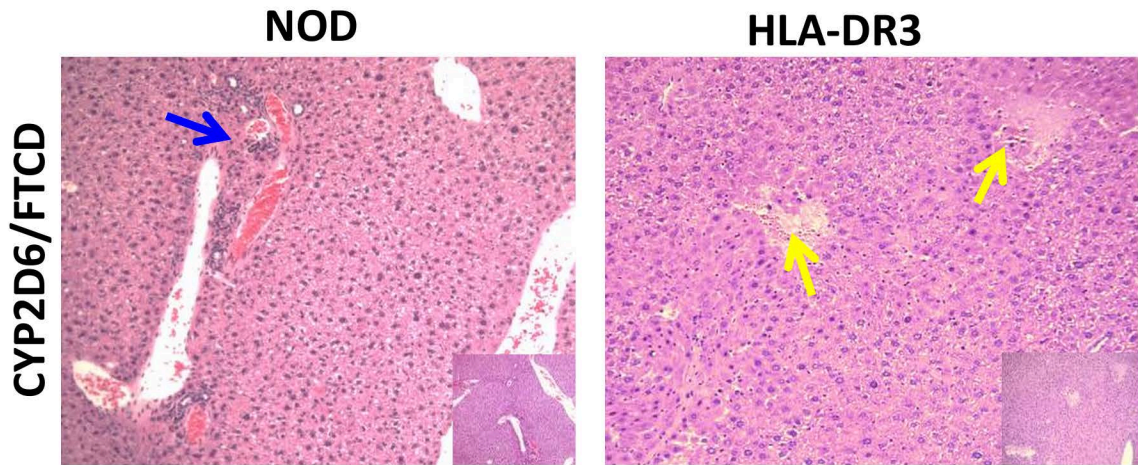

## B

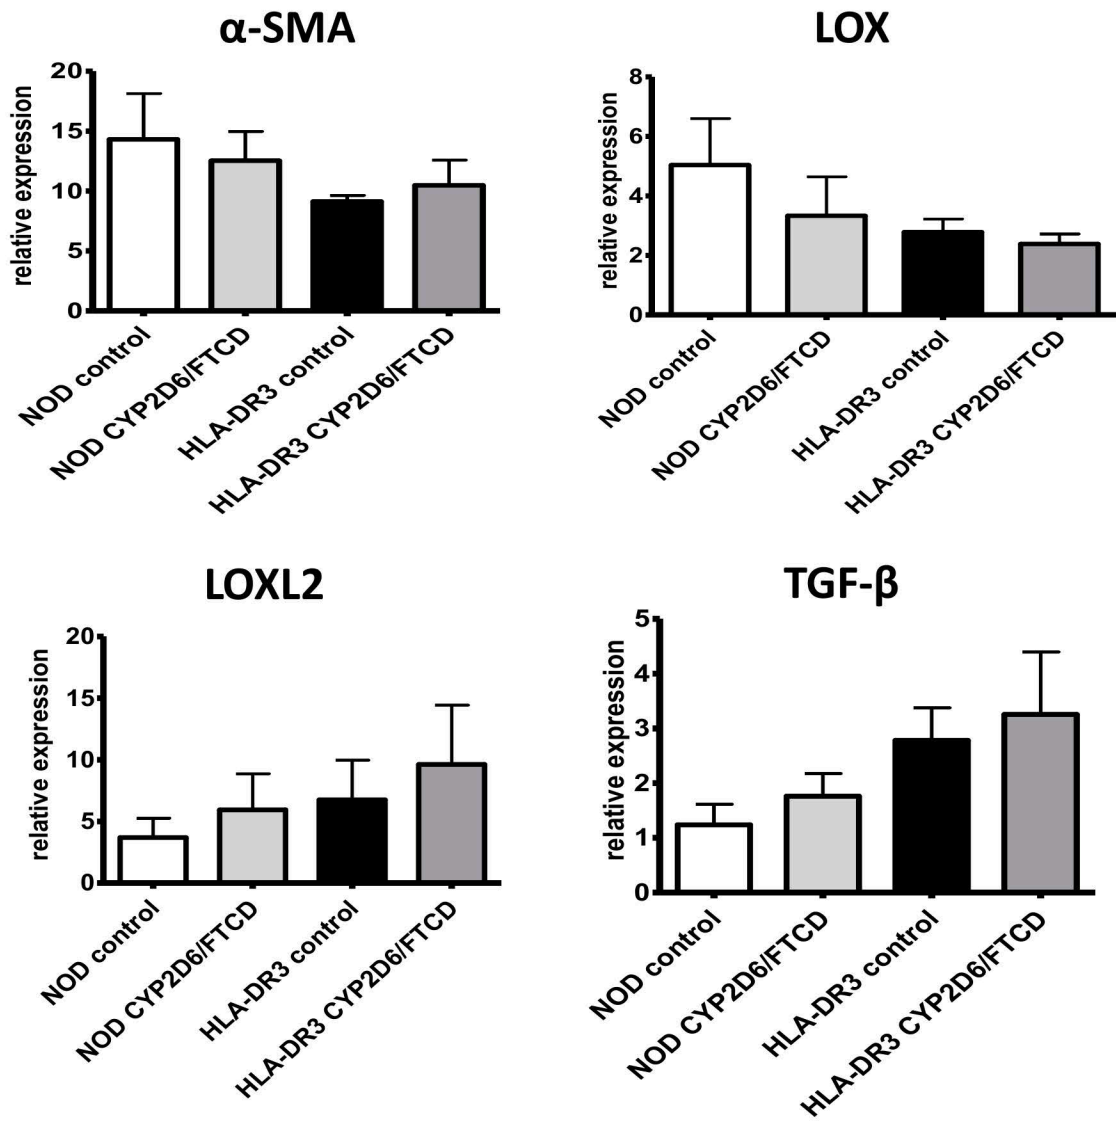

Supplement: NIHMS722531-supplement-Supp_FigureS1.pdf [file NIHMS722531-supplement-Supp_FigureS1.pdf]
